# Supplementary material for: Insecticidal activity and biochemical composition of Citrullus colocynthis, Cannabis indica and Artemisia argyi extracts against cabbage aphid (Brevicoryne brassicae L.)
Source: PubMed Central journal article supplement (PMC6965137; doi:10.1038/s41598-019-57092-5), 2020-01-16
Supplement: 41598_2019_57092_MOESM1_ESM.pdf [file 41598_2019_57092_MOESM1_ESM.pdf]

# Insecticidal activity and biochemical composition of *Citrullus colocynthis*, *Cannabis indica* and *Artemisia argyi* extracts against cabbage aphid (*Brevicoryne brassicae* L.)

Maqsood Ahmed<sup>1,\*</sup>, Qin Peiwen<sup>1,\*</sup>, Zumin Gu<sup>1</sup>, Yuyang Liu<sup>1</sup>, Aatika Sikandar<sup>1,\*</sup>, Dilbar Hussain<sup>4</sup>, Ansar Javeed<sup>2,\*</sup>, Jamil Shafi<sup>3</sup>, Mazher Farid Iqbal<sup>2</sup>, Ran An<sup>1</sup>, Hongxia Guo<sup>1</sup>, Ying Du<sup>1</sup>, Weijing Wang<sup>1</sup>, Yumeng Zhang<sup>1</sup> & Mingshan Ji<sup>1,\*</sup>

## Supplementary Tables.

**Table S 1.** Mean mortality of *B. brassicae* by residual/ leaf dip bioassay at different concentrations by ethanol extract of CCL, CIL and ATL.

| Plants Extract | Conc. (mgmL <sup>-1</sup> ) | Mean mortality                 |                                |                                |
|----------------|-----------------------------|--------------------------------|--------------------------------|--------------------------------|
|                |                             | 24 h                           | 48 h                           | 72 h                           |
| CCL            | 2.5                         | 10±2.23 <sup>d</sup>           | 15±2.23 <sup>d</sup>           | 28.33±5.62 <sup>d</sup>        |
|                | 5                           | 13.33±1.29 <sup>cd</sup>       | 20±2.23 <sup>cd</sup>          | 31.67±5.62 <sup>d</sup>        |
|                | 10                          | 16.67±1.29 <sup>c</sup>        | 23.33±1.29 <sup>c</sup>        | 40±3.87 <sup>d</sup>           |
|                | 15                          | 18.33±1.29 <sup>bc</sup>       | 26.67±1.29 <sup>c</sup>        | 63.33±1.29 <sup>c</sup>        |
|                | 20                          | 23.33±2.58 <sup>b</sup>        | 40±2.23 <sup>b</sup>           | 76.66±1.29 <sup>b</sup>        |
|                | +ive control                | 81.67±1.29 <sup>a</sup>        | 88.33±1.29 <sup>a</sup>        | 98.33±3.87 <sup>a</sup>        |
|                | CK                          | 0±0 <sup>e</sup>               | 0±0 <sup>e</sup>               | 1.67±1.29 <sup>e</sup>         |
|                | Statistics summary          | $F=163.97, P= 0.000$<br>DF=104 | $F=151.28, P= 0.000$<br>DF=104 | $F=53.93, P= 0.000$<br>DF=104  |
| CIL            | 2.5                         | 6.67±2.58 <sup>cd</sup>        | 18.33±3.4 <sup>d</sup>         | 40±2.23 <sup>d</sup>           |
|                | 5                           | 8.33±1.29 <sup>c</sup>         | 30±2.23 <sup>cd</sup>          | 50±2.23 <sup>c</sup>           |
|                | 10                          | 13.33±1.29 <sup>bc</sup>       | 30±2.58 <sup>cd</sup>          | 56.67±4.40 <sup>bc</sup>       |
|                | 15                          | 16.67±3.41 <sup>b</sup>        | 38.33±2.58 <sup>c</sup>        | 61.67±2.58 <sup>b</sup>        |
|                | 20                          | 20±2.23 <sup>b</sup>           | 45±4.47 <sup>c</sup>           | 66.67±2.58 <sup>b</sup>        |
|                | +ive control                | 86.66±1.29 <sup>a</sup>        | 91.67±2.58 <sup>b</sup>        | 96.67±2.58 <sup>a</sup>        |
|                | CK                          | 0±0 <sup>e</sup>               | 0±0 <sup>e</sup>               | 1.67±1.29 <sup>e</sup>         |
|                | Statistics summary          | $F=128.33, P= 0.000$<br>DF=104 | $F=61.92, P= 0.000$<br>DF=104  | $F=77.94, P= 0.000$<br>DF=104  |
| ATL            | 2.5                         | 5±2.23 <sup>de</sup>           | 23.33±1.29 <sup>d</sup>        | 35±2.23 <sup>c</sup>           |
|                | 5                           | 15±2.23 <sup>cd</sup>          | 26.67±1.29 <sup>d</sup>        | 65±2.23 <sup>d</sup>           |
|                | 10                          | 18.33±2.5 <sup>c</sup>         | 43.33±1.89 <sup>c</sup>        | 76.67±1.29 <sup>c</sup>        |
|                | 15                          | 31.67±3.41 <sup>b</sup>        | 53.33±3.41 <sup>b</sup>        | 81.67±3.8 <sup>c</sup>         |
|                | 20                          | 35±3.83 <sup>b</sup>           | 60±2.23 <sup>b</sup>           | 88.33±1.29 <sup>b</sup>        |
|                | +ive control                | 81.67±3.41 <sup>a</sup>        | 90±3.87 <sup>a</sup>           | 96.6±1.29 <sup>a</sup>         |
|                | CK                          | 0±0 <sup>e</sup>               | 0±0 <sup>e</sup>               | 1.67±1.29 <sup>e</sup>         |
|                | Statistics summary          | $F=57.34, P= 0.001$<br>DF=104  | $F=97.45, P= 0.001$<br>DF=104  | $F=261.85, P= 0.001$<br>DF=104 |

Whereas: CCL (*C. colocynthis*); CIL (*C. Indica*); ATL (*A. argyi*); Values are represented as mean ± standard error followed by different superscripts are significantly different according to (Tukey's HSD  $P > 0.05$ ).

**Table S 2.** Analysis of variance of the effect of mortality (%) versus treatment, concentration and time by residual/leaf dip assay

| Source    | Type III<br>S.S | DF  | M.S        | F       |
|-----------|-----------------|-----|------------|---------|
| C.M       | 177357.143      | 104 | 2860.599   | 101***  |
| I         | 278876.190      | 1   | 278876.190 | 9851*** |
| t         | 3342.857        | 2   | 1671.429   | 59.0*** |
| C         | 128181.217      | 6   | 21363.536  | 754***  |
| T         | 30891.270       | 2   | 15445.635  | 545***  |
| t × C     | 2927.513        | 12  | 243.959    | 8.62*** |
| t × T     | 820.635         | 4   | 205.159    | 7.25*** |
| C × T     | 9329.101        | 12  | 777.425    | 27.5*** |
| t × C × T | 1864.550        | 24  | 77.690     | 2.75*** |

**Note:** S.S (Sum of Square); M.S (Mean square); DF (Degree of freedom); C.M (Corrected model); I (Intercept); t (Treatments); C (Concentrations); T (Time); t×C (Treatments ×Concentrations); t×T (Treatments × Time); C×T (Concentrations × Time); t×C×T (Treatments × Concentrations × Time).

**Table S 3.** Mean mortality of *B. brassicae* by contact/aphid dip bioassay at different concentrations by ethanol extract of CCL, CIL and ATA.

| Plants Extract | Conc. (mgml <sup>-1</sup> ) | Mean mortality                |                                |                               |
|----------------|-----------------------------|-------------------------------|--------------------------------|-------------------------------|
|                |                             | 24 h                          | 48 h                           | 72 h                          |
| CCL            | 2.5                         | 53.33±5.16 <sup>c</sup>       | 56.67±6.83 <sup>d</sup>        | 58.33±5.62 <sup>d</sup>       |
|                | 5                           | 58.33±5.16 <sup>c</sup>       | 61.67±5.62 <sup>cd</sup>       | 65±4.47 <sup>d</sup>          |
|                | 10                          | 61.67±4.65 <sup>bc</sup>      | 66.67±3.41 <sup>bcd</sup>      | 71.67±3.41 <sup>cd</sup>      |
|                | 15                          | 68.33±1.29 <sup>bc</sup>      | 75±2.23 <sup>b</sup>           | 81.67±3.41 <sup>bc</sup>      |
|                | 20                          | 75±2.2 <sup>b</sup>           | 80±0.15 <sup>ab</sup>          | 83.33±2.58 <sup>bc</sup>      |
|                | +ive control                | 95±2.23 <sup>a</sup>          | 95±2.23 <sup>a</sup>           | 98.33±1.29 <sup>b</sup>       |
|                | CK                          | 0±0 <sup>d</sup>              | 0±0 <sup>e</sup>               | 1.67±1.29 <sup>e</sup>        |
|                | Statistics summary          | $F=33.18, P= 0.000$<br>DF=104 | $F=34.90, P= 0.000$<br>DF=104  | $F=41.62, P= 0.000$<br>DF=104 |
| CIL            | 2.5                         | 23.33±5.16 <sup>d</sup>       | 38.33±1.29 <sup>c</sup>        | 71.67±3.41 <sup>c</sup>       |
|                | 5                           | 33.33±5.16 <sup>cd</sup>      | 41.67±1.29 <sup>c</sup>        | 78.33±2.58 <sup>bc</sup>      |
|                | 10                          | 46.67±6.83 <sup>bc</sup>      | 56.67±1.29 <sup>b</sup>        | 78.33±2.58 <sup>bc</sup>      |
|                | 15                          | 55±2.23 <sup>b</sup>          | 60±2.23 <sup>b</sup>           | 81.67±1.29 <sup>bc</sup>      |
|                | 20                          | 58.33±2.58 <sup>b</sup>       | 63.33±2.58 <sup>b</sup>        | 81.67±1.29 <sup>b</sup>       |
|                | +ive control                | 91.67±2.58 <sup>a</sup>       | 96.67±2.58 <sup>a</sup>        | 98.33±1.29 <sup>a</sup>       |
|                | CK                          | 0±0 <sup>e</sup>              | 0±0 <sup>d</sup>               | 1.67±1.29 <sup>d</sup>        |
|                | Statistics summary          | $F=25.72, P= 0.000$<br>DF=104 | $F=147.12, P= 0.000$<br>DF=104 | $F=98.96, P= 0.000$<br>DF=104 |
| ATL            | 2.5                         | 36.66±2.58 <sup>c</sup>       | 43.33±2.58 <sup>d</sup>        | 46.67±3.41 <sup>d</sup>       |
|                | 5                           | 58.33±2.58 <sup>bc</sup>      | 56.67±3.41 <sup>c</sup>        | 60±4.47 <sup>c</sup>          |
|                | 10                          | 58.33±6.45 <sup>ab</sup>      | 61.67±1.29 <sup>bc</sup>       | 68.33±1.29 <sup>c</sup>       |
|                | 15                          | 60±5.91 <sup>ab</sup>         | 65±3.87 <sup>bc</sup>          | 83.33±1.29 <sup>b</sup>       |
|                | 20                          | 65±5.91 <sup>ab</sup>         | 70±2.23 <sup>b</sup>           | 93.33±3.41 <sup>b</sup>       |
|                | +ive control                | 88.33±3.41 <sup>a</sup>       | 93.33±3.41 <sup>a</sup>        | 100±0 <sup>b</sup>            |
|                | CK                          | 0±0 <sup>d</sup>              | 0±0 <sup>e</sup>               | 1.67±1.29 <sup>e</sup>        |
|                | Statistics summary          | $F=15.07, P= 0.000$<br>DF=104 | $F=47.62, P= 0.000$<br>DF=104  | $F=88.74, P= 0.000$<br>DF=104 |

Whereas: CCL (*C. colocynthis*); CIL (*C. indica*); ATL (*A. argyi*); Values are represented as mean ± standard error followed by different superscripts are significantly different according to (Tukey's HSD  $P > 0.05$ )

**Table S 4.** Analysis of variance of the effect of mortality (%) versus treatment, concentration and time by contact/aphid dip assay.

| Source    | Type III S.S | D.F | M.S        | F                  |
|-----------|--------------|-----|------------|--------------------|
| C.M       | 158105.026   | 62  | 2550.081   | 44.4***            |
| I         | 640211.640   | 1   | 640211.640 | 11152.0***         |
| t         | 1683.598     | 2   | 841.799    | 14.6***            |
| C         | 140995.767   | 6   | 23499.295  | 409***             |
| T         | 7743.122     | 2   | 3871.561   | 67.4***            |
| t × C     | 1086.772     | 12  | 90.564     | 1.57 <sup>NS</sup> |
| t × T     | 2311.640     | 4   | 577.910    | 10.1***            |
| C × T     | 1821.693     | 12  | 151.808    | 2.64**             |
| t × C × T | 2462.434     | 24  | 102.601    | 1.79*              |

**Note:** S.S (Sum of Square); M.S (Mean square); C.M (Corrected model); I (Intercept); t (Treatments); C (Concentrations); T (Time); t×C (Treatments ×Concentrations); t×T (Treatments × Time); C×T (Concentrations × Time); t×C×T (Treatments × Concentrations × Time); N.S (non-significant)
